# Supplementary material
Source: publisher site journal article supplement (https://www.degruyterbrill.com/publication/isbn/9783486718096/downloadAsset/9783486718096_Buchinformation.pdf)
Supplement: Supplementary file 1 [file 9783486718096_Buchinformation.pdf]

# Der Auftakt zur Nachrüstungsdebatte

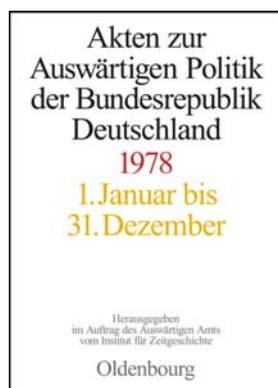

Akten zur Auswärtigen Politik  
der Bundesrepublik Deutschland  
**1978**

Herausgegeben im Auftrag des Auswärtigen Amts  
vom Institut für Zeitgeschichte  
Haupterausgeber Horst Möller  
Mitherausgeber Klaus Hildebrand und Gregor Schöllgen  
Wissenschaftliche Leiterin: Ilse Dorothee Pautsch  
Bearbeitet von Daniela Taschler, Amit Das Gupta und Michael Mayer

2009 | LXXXIV, 2108 S. | Leinen  
in 2 Teilbänden | € 138,00  
ISBN 978-3-486-58729-6

In der Übersicht  
unter:

[www.oldenbourg-wissenschaftsverlag.de/aapd](http://www.oldenbourg-wissenschaftsverlag.de/aapd)

Die Kontroverse um die Neutronenwaffe überschattete 1978 die deutsch-amerikanischen Beziehungen. Zudem rückte die sowjetische Überlegenheit im Bereich der Mittelstreckenwaffen ins Zentrum der strategischen Diskussion. In der Ost- und Deutschlandpolitik markierten der Besuch des Generalsekretärs Breschnew sowie der Abschluss der Verkehrsverhandlungen mit der DDR wichtige Fortschritte. Demgegenüber stagnierte der multilaterale Entspannungsprozess: Weder die KSZE-Folgekonferenz von Belgrad noch die MBFR-Verhandlungen in Wien brachten den erhofften Fortschritt. Während die Konferenz von Camp David Hoffnung auf Frieden im Nahen Osten weckte, verschärften sich die Unruhen im Iran. Auf dem Weltwirtschaftsgipfel in Bonn verwandte die Bundesregierung ihren Einfluss auf die Stabilisierung der Währungsmärkte und die Überwindung der weltwirtschaftlichen Flaute. Unter deutscher Ratspräsidentschaft konnte das Europäische Währungssystem als Voraussetzung für den heutigen Euro-Währungsraum eingeführt und ein Durchbruch bei den Beitrittsverhandlungen mit Griechenland als Auftakt zur EG-Süderweiterung erreicht werden.

[oldenbourg.de](http://oldenbourg.de)

Rezensionsexemplare auf Anforderung:

**Pressereferat Geisteswissenschaften – Ulrike Staudinger**

Oldenbourg Wissenschaftsverlag | Rosenheimer Str. 145 | 81671 München

Tel.: +49 89 45051-211 | Fax: +49 89 45051-204 | [ulrike.staudinger@oldenbourg.de](mailto:ulrike.staudinger@oldenbourg.de)

Alle Veröffentlichungen des Oldenbourg Verlags sind über den Buchhandel zu beziehen.
